# Supplementary material for: DrImpute: imputing dropout events in single cell RNA sequencing data
Source: PubMed Central journal article supplement (PMC5994079; doi:10.1186/s12859-018-2226-y), 2018-06-08
Supplement: 12859_2018_2226_MOESM1_ESM.pdf [file 12859_2018_2226_MOESM1_ESM.pdf]

# Supplementary Figure 1

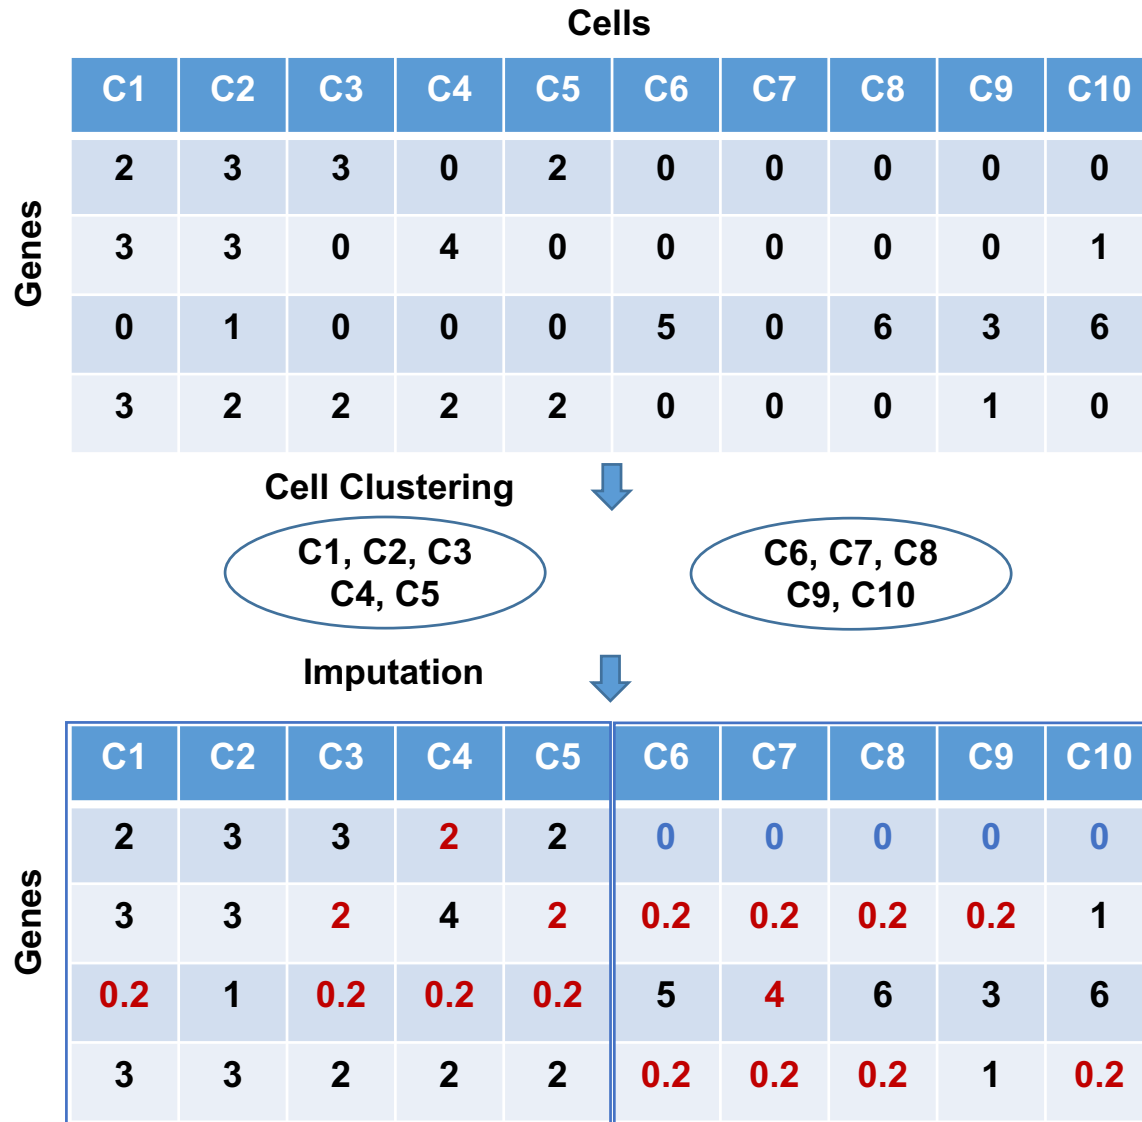

1 **Supplementary Figure 1. Basic procedure for clustering-based imputation.** Upper  
2 matrix is a gene by cell matrix. After clustering on gene by cell matrix, we observe C1–  
3 C5 as one cluster and C6–C10 as the other cluster. Imputation is performed by  
4 averaging each cluster.  
5

# Supplementary Figure 2

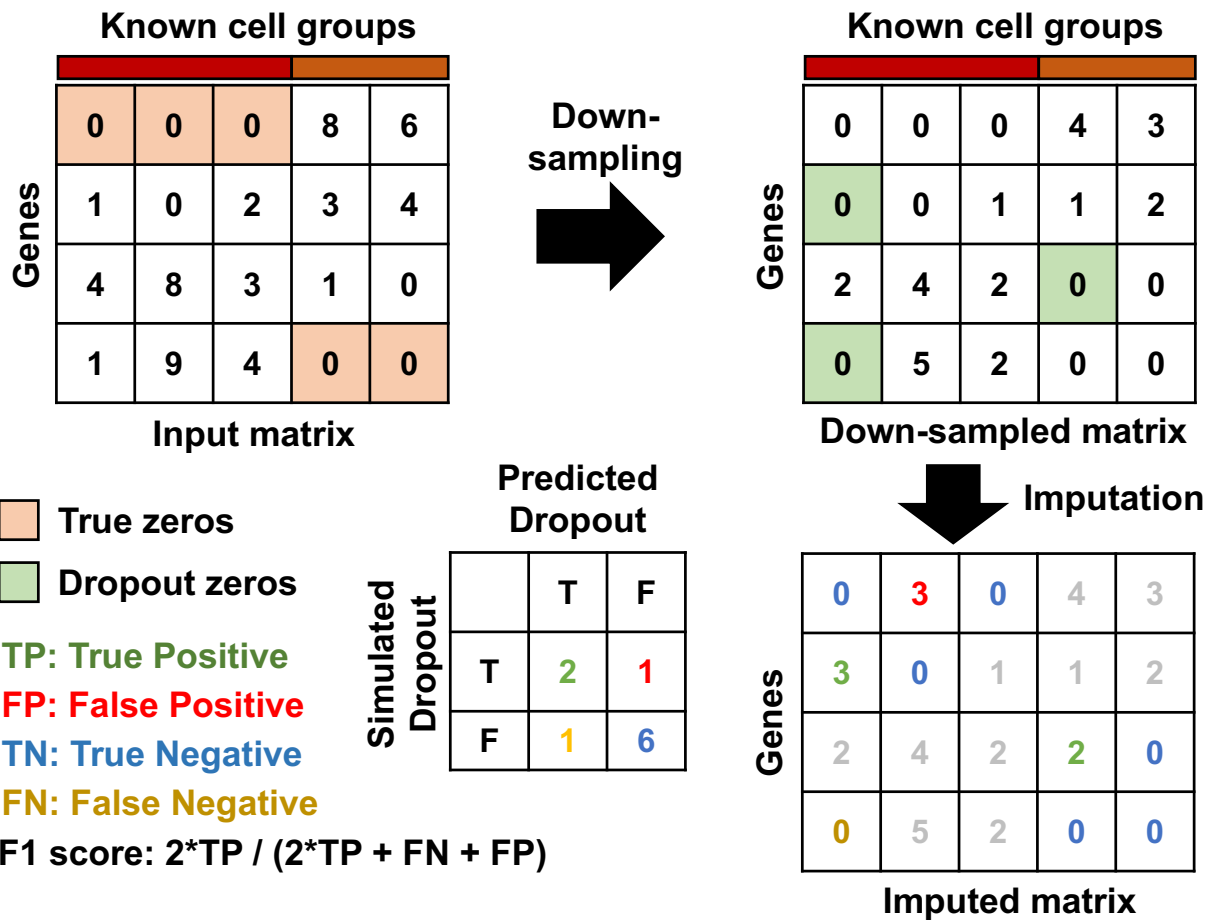

8 **Supplementary Figure 2. Overview of the down-sampling studies on**  
9 **discriminating true zeros and dropout zeros.** We defined the *true zeros* as the  
10 genes where expression levels are consistently zero across all cells belonging to one  
11 cell cluster. To generate the *dropout zero*, we randomly down-sampled the raw  
12 sequencing reads to a certain percent (e.g. 25%) of the total number of reads, mapped  
13 the sampled reads onto the genome and computed the corresponding gene-cell read  
14 count matrices. We defined *dropout zero* as the genes where expression levels are  
15 zero in the down-sampled datasets, but are positive in the full dataset. The imputed  
16 zero events could be therefore grouped into four situations: (1) true positive (TP,  
17 imputed dropout zeros), (2) true negative (TN, non-imputed true zeros), (3) false  
18 positive (FP, imputed true zeros) and (4) false negative (FN, non-imputed dropout  
19 zeros). The F1 score (the harmonic mean of precision and recall) was used to evaluate  
20 the imputation performance of each method on down-sampled datasets.

21

22

23

# Supplementary Figure 3

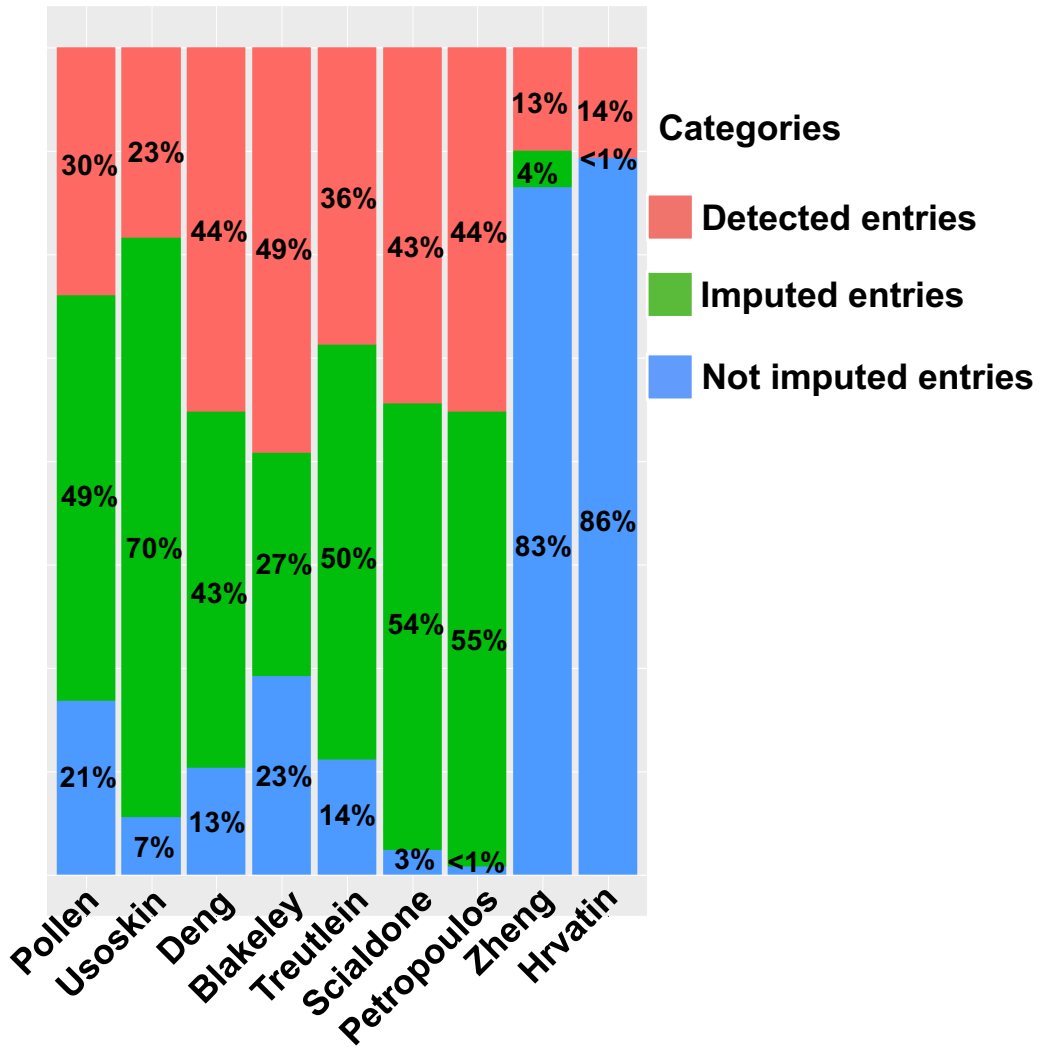

24 **Supplementary Figure 3. Overview of percent of detected, imputed and not**  
25 **imputed entries in scRNA-seq datasets used in this study.** Percentage of detected  
26 (input read count > 0), imputed (input read count is zero and the imputed read count is  
27 positive), and not imputed entries (both input and imputed read count are zeros) for nine  
28 different scRNA-seq datasets. Genes that were expressed in less than 2 cells were  
29 excluded before this analysis.  
30

# Supplementary Figure 4

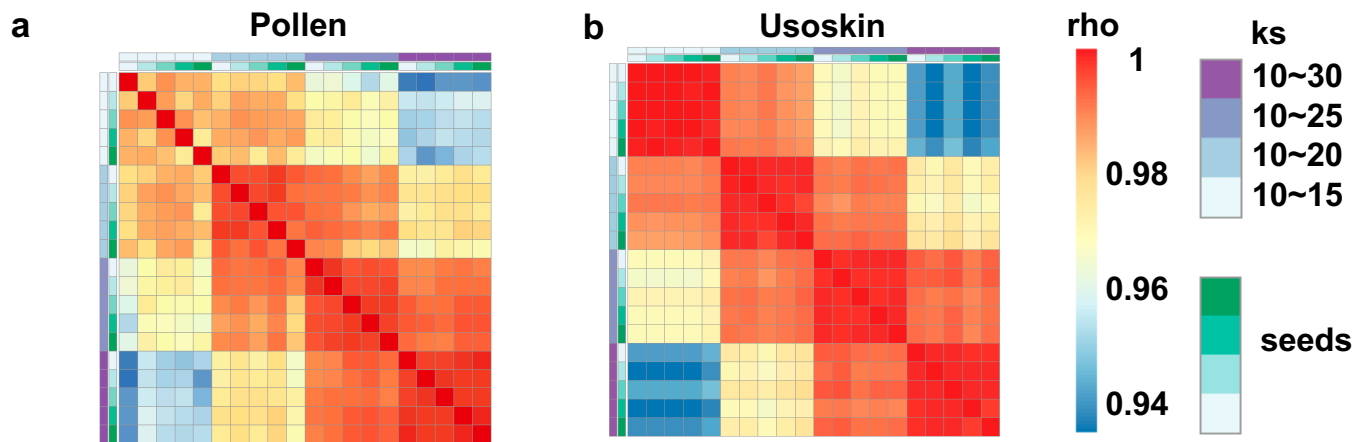

31 **Supplementary Figure 4. Drlmpute was robust on the different choices of the  $k$**   
32 **ranges and random seeds for the (a) Pollen and (b) Usoskin datasets.** The  
33 robustness of imputation results were evaluated on different choices of number clusters:  
34  $k = 10 - 15$  (default),  $k = 10 - 20$ ,  $k = 10 - 25$  and  $k = 10 - 30$ , as well as different  
35 random number seeds (1 - 5) for k-means initialization. The robustness was  
36 quantitatively measured as Pearson's correlation coefficient of imputed zero entries  
37 between any two conditions (choices of  $k$  ranges and random seeds). The color of the  
38 heatmap indicates the Pearson's correlation coefficient.

39

40

41

42



# Supplementary Figure 5

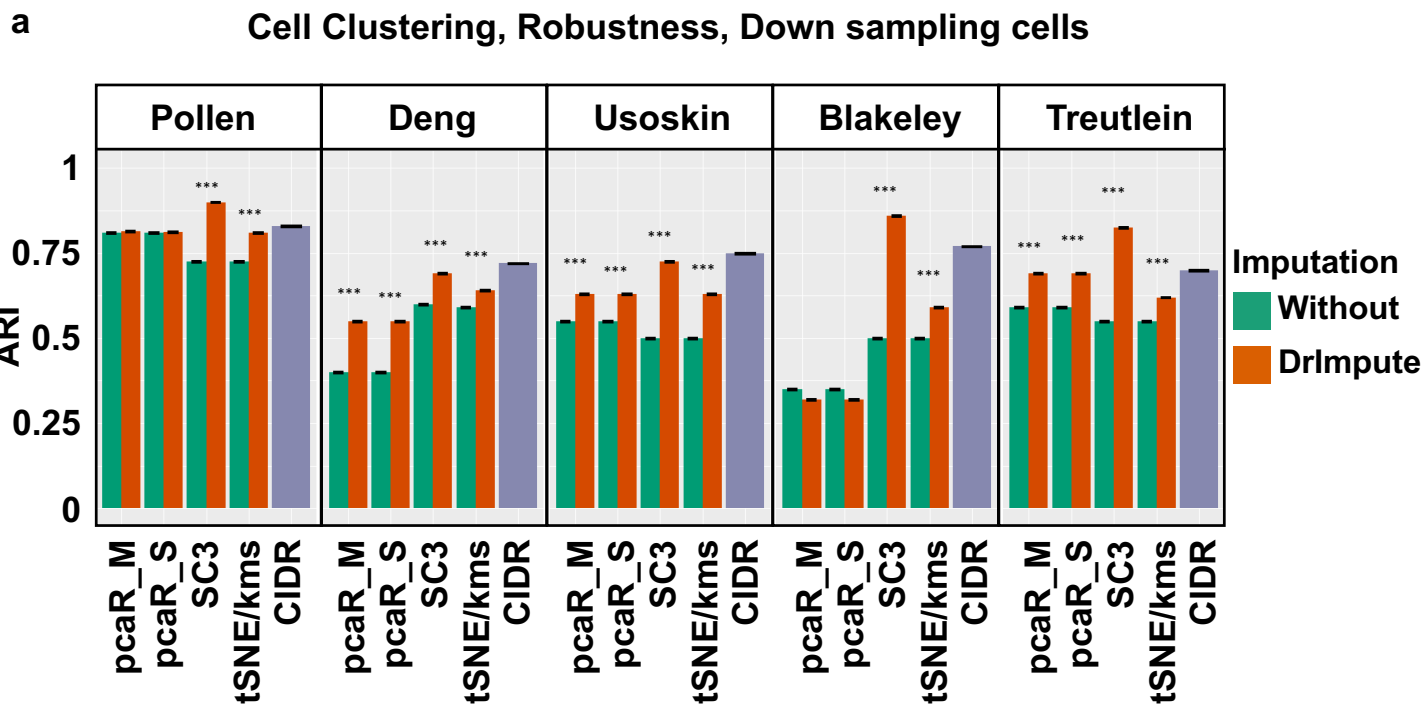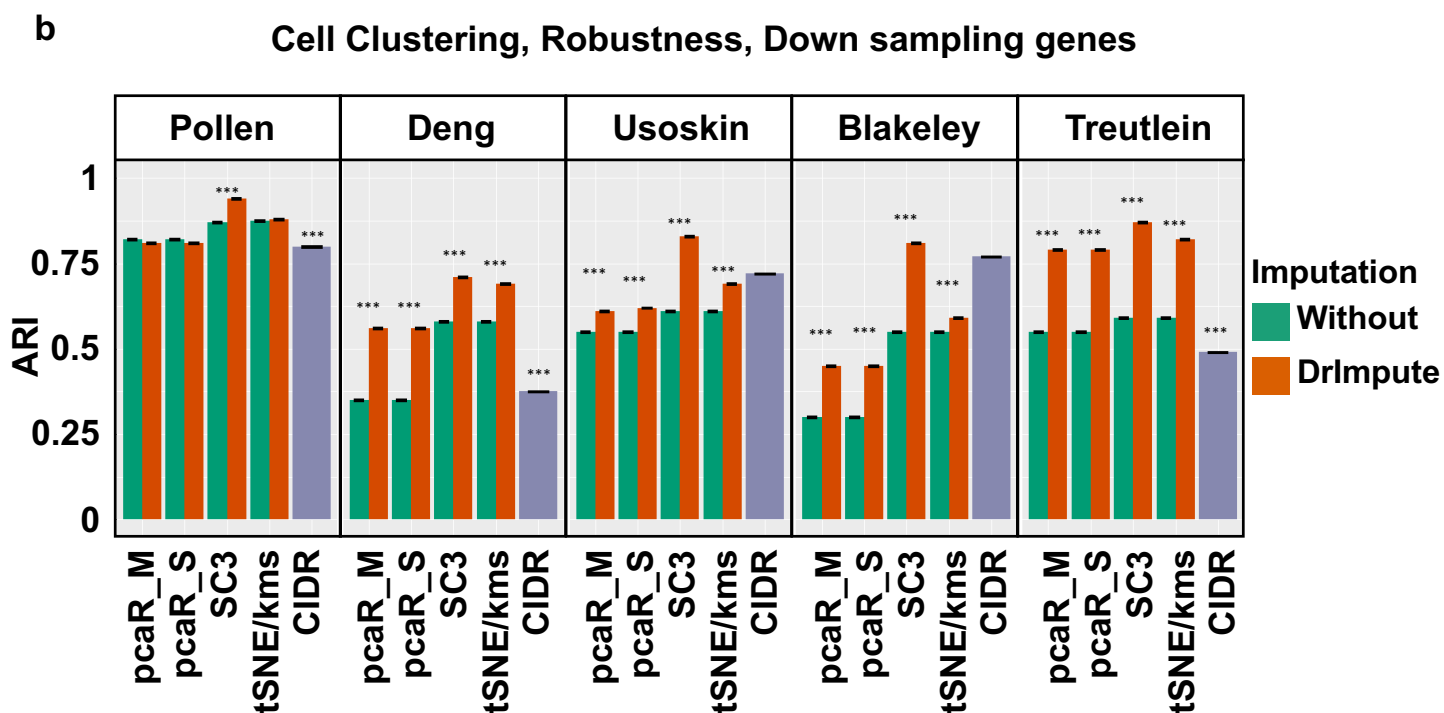

43 **Supplementary Figure 5. Drlmpute significantly improved the performance of the**  
44 **existing tools for cell type identification in robustness criteria.** To account for  
45 robustness, original datasets were down-sampled by cells (a) or by genes (b); we  
46 recorded clustering results for each data subset. ARIs are calculated for each pair of  
47 data subsets. Barplot represents averaged ARIs. Blue interval represents one plus or  
48 minus standard deviation of the data. Black interval represents one plus or minus  
49 standard error of the data. Wilcoxon rank sum test is performed to compare before and  
50 after imputation. For down-sampled cells, 16 out of 20 cases are improved. For down-  
51 sampled genes, 18 out of 20 cases are improved (\*\**p* value < 0.001).  
52

# Supplementary Figure 6

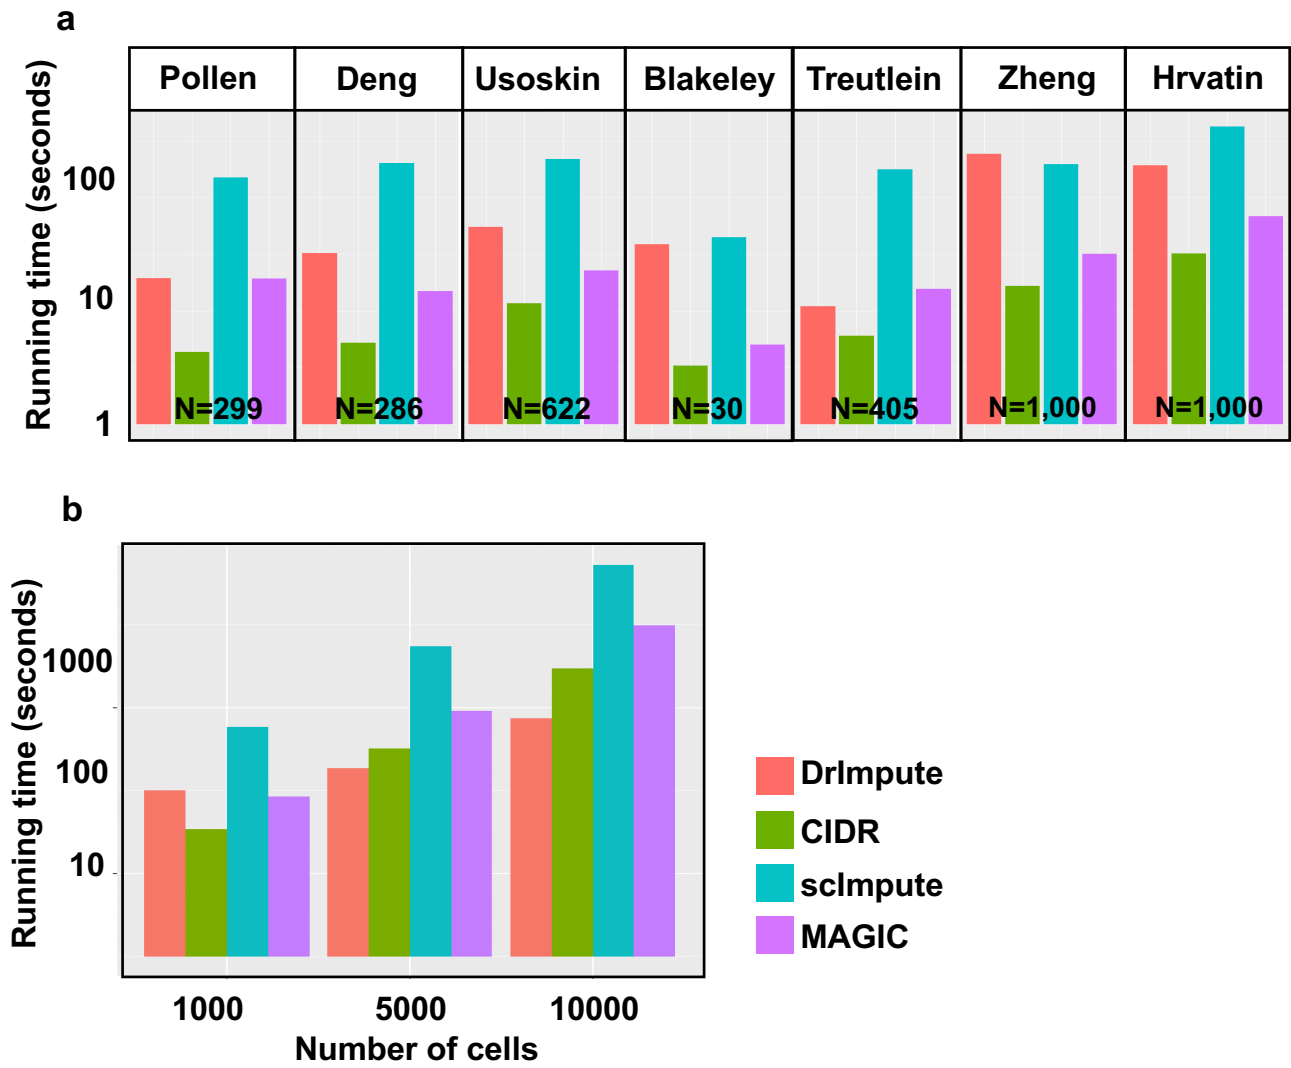

53 **Supplementary Figure 6. Drlmpute is efficient on imputing large-scale scRNA-seq**  
54 **datasets. (a)** The running time of Drlmpute, CIDR, sclmpute and MAGIC on nine  
55 tested datasets are presented. The y-axis indicates the running time in seconds. **(b)**  
56 The running time of Drlmpute, CIDR, sclmpute and MAGIC on randomly sampled  
57 1,000, 5,000 and 10,000 cells from the Zheng dataset are presented. All the analysis  
58 were performed on Intel Xeon 2.4GHz CPU. For both Drlmpute and sclmpute, 4 CPU  
59 cores were used for the analysis.
